# Supplementary material for: MicroRNA-223-3p promotes skeletal muscle regeneration by regulating inflammation in mice
Source: PubMed Central journal article supplement (PMC7383371; doi:10.1074/jbc.ra119.012263), 2020-06-03
Supplement: supp_RA119.012263_157640_2_supp_540780_qbpwk2.pdf [file supp_RA119.012263_157640_2_supp_540780_qbpwk2.pdf]

# MicroRNA-223-3p promotes skeletal muscle regeneration by regulating inflammation in mice

Naixuan Cheng<sup>1,2</sup>, Chang Liu<sup>2</sup>, Yulin Li<sup>2</sup>, Shijuan Gao<sup>2</sup>, Ying-Chun Han<sup>2</sup>, Xiaonan Wang<sup>2,3</sup>, Jie Du<sup>2,\*</sup>, Congcong Zhang<sup>2,\*</sup>

- Supplemental Experimental procedures
- Supplemental Figure 1-4
- Supplemental Table 1-2

## Experimental procedures

**MiRNA agomir or antagomir in vivo transfection.** miRNA agomir or antagomir ( $0.6\mu\text{Mol}\cdot\text{Kg}^{-1}$ , RiboBio, Guangzhou, China) was injected into WT mice angula veins at 3 day and 1 day before and after CTX injury and mice were analyzed at the indicated time points.

**Primary MuSC isolation, culture, and differentiation** Primary MuSCs were isolated from mice as previously described (40). In brief, hindlimb muscles were dissected, finely minced, and dissociated by digestion with collagenase I (200 U/mL, Gibco) and dispase II (2.4 U/mL, Gibco) for 45 minutes at 37°C and 100 rpm. The muscle slurry was diluted in PBS, filtered through a 100- $\mu\text{m}$  cell strainer, and centrifuged at 1,500 rpm for 5 minutes. Cells were resuspended in growth culture medium (F-10 medium supplemented with 10% fetal bovine serum and 1% penicillin-streptomycin) and seeded in a dish. After two hours, unadhered cells were transferred to a Matrigel (Corning, Bedford, MA, USA)-coated dish. After 24 hours, unattached cells were removed, and the adherent cells (MuSCs) were cultured with growth medium in a humidified incubator at 37°C with 5% CO<sub>2</sub>. For MuSC differentiation, cells were cultured in differentiation medium (F-10 medium supplemented with 2% horse serum and 1% penicillin-streptomycin) for 3 days.

**MuSC proliferation and differentiation analysis** Proliferation analysis was performed using the Cell Light EdU Apollo 488 In Vitro Kit (RiboBio) according to the manufacturer's instruction. In brief, 50  $\mu\text{M}$  EdU was added to the growth medium of MuSCs. Four hours later, cells were fixed in 4% paraformaldehyde for 30 minutes, permeabilized with 0.5% Triton X-100 for 10 minutes, and incubated with Apollo staining reaction solution for 30 minutes at room temperature. Nuclei were counterstained with Hoechst in PBS. An ImageXpress Micro High-Content Imaging System (Molecular Devices, USA) was used to acquire images of random fields of view and analyze the percentage of EdU<sup>+</sup> MuSCs cells. For differentiation analysis, MuSCs were fixed in 4% paraformaldehyde for 10 minutes and incubated with primary antibody eMHC (1:200; Developmental Studies Hybridoma Bank) at 4°C overnight after permeabilizing with 0.5% Triton X-100 for 10 minutes and blocking with serum for 30 minutes, then incubated with Alexa 488-conjugated polyclonal anti-mouse IgG secondary antibody (1:1000; Cell Signaling Technologies, Carlsbad, CA, USA) at 37°C for 30 minutes and stained with 4',6-diamidino-2-phenylindole (DAPI; Vector Labs, Burlingame, CA, USA). An ECLIPSE 90i fluorescence digital microscope was used to acquire images and NIS-Elements Br 3.0 software was used to analyze the

eMHC<sup>+</sup> area.

**MiRNA mimic in vitro transfection transfection** Primary MuSCs were transfected with micrON mmu-miR-223-3p mimic (50 nM) or a negative control mimic (50 nM; both RiboBio) using Lipofectamine 3000 (Invitrogen) according to the manufacturer's guidelines. Cells were harvested or treated 36 hours after transfection. The efficiency was confirmed by RT-PCR examining miRNA expression after transfection.

Figure S1

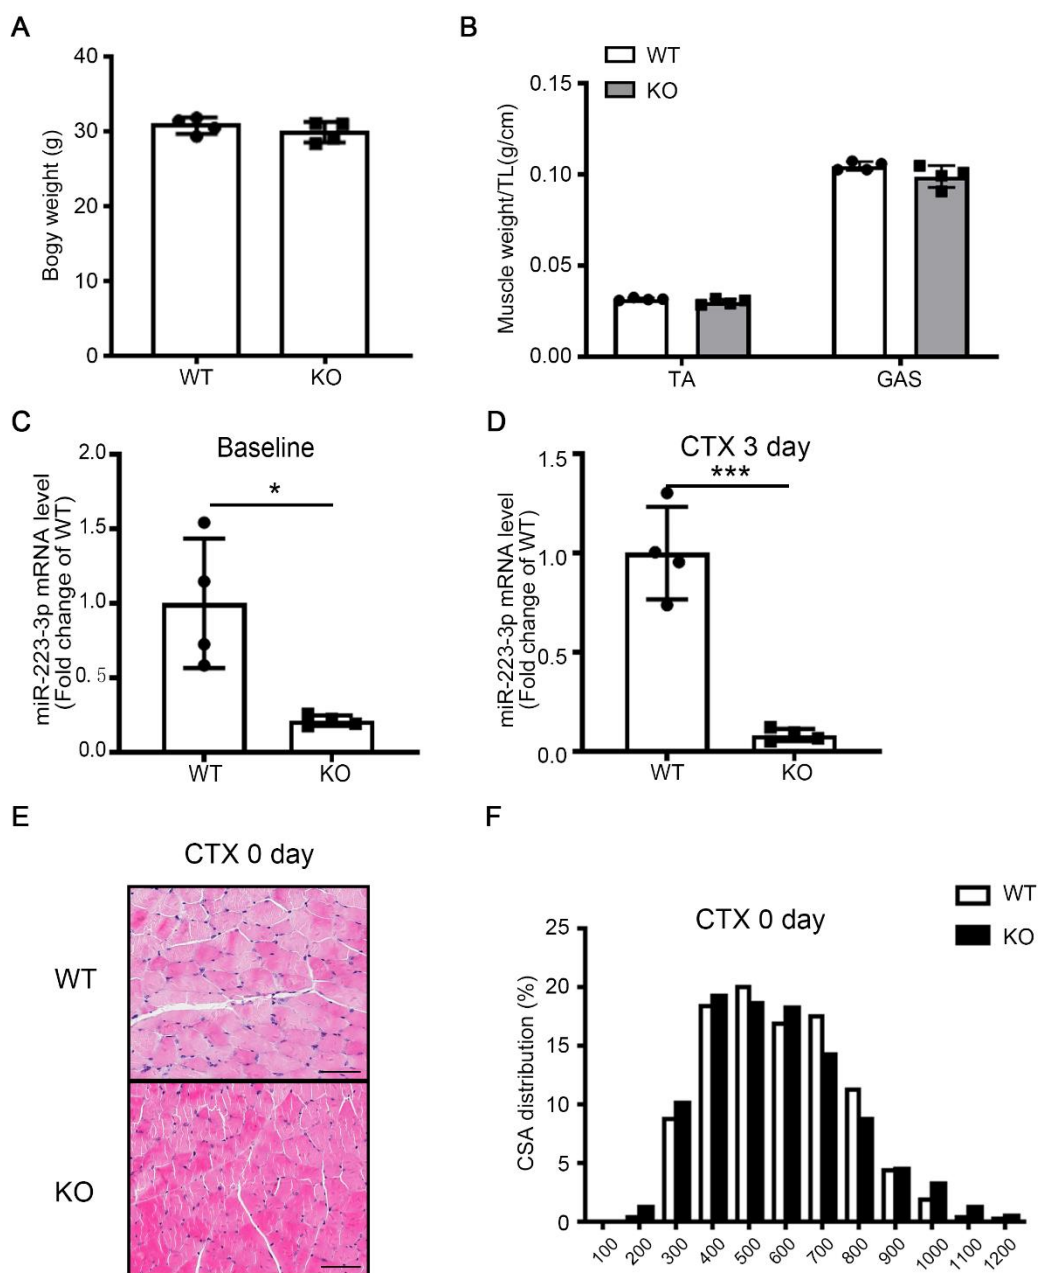

**Figure S1. General physiology of miR-223-3p KO mice**

- A. Body weight of WT and miR-223-3p KO mice at baseline (n=4 per group).
  - B. Ratio of TA mass to the tibia length of WT and miR-223-3p KO mice at baseline (n=4 per group).
  - C. RT-PCR assessment of miR-223-3p expression in uninjured muscles of WT and miR-223-3p KO mice (changed fold compared with WT muscle) (n=4 per group).
  - D. RT-PCR assessment of miR-223-3p expression in muscles of WT and miR-223-3p KO mice 3 days after injury (changed fold compared with WT muscle) (n=4 per group).
  - F. Representative HE staining of uninjured muscles of WT and miR-223-3p KO mice. Scale bar, 100  $\mu\text{m}$ .
  - G. CSA distributions of uninjured muscles of WT and miR-223-3p KO mice.
- Data are expressed as the mean  $\pm$  SD. \* $P < 0.05$ , \*\*\* $P < 0.001$  by unpaired two-tailed Student's t-test.

Figure S2

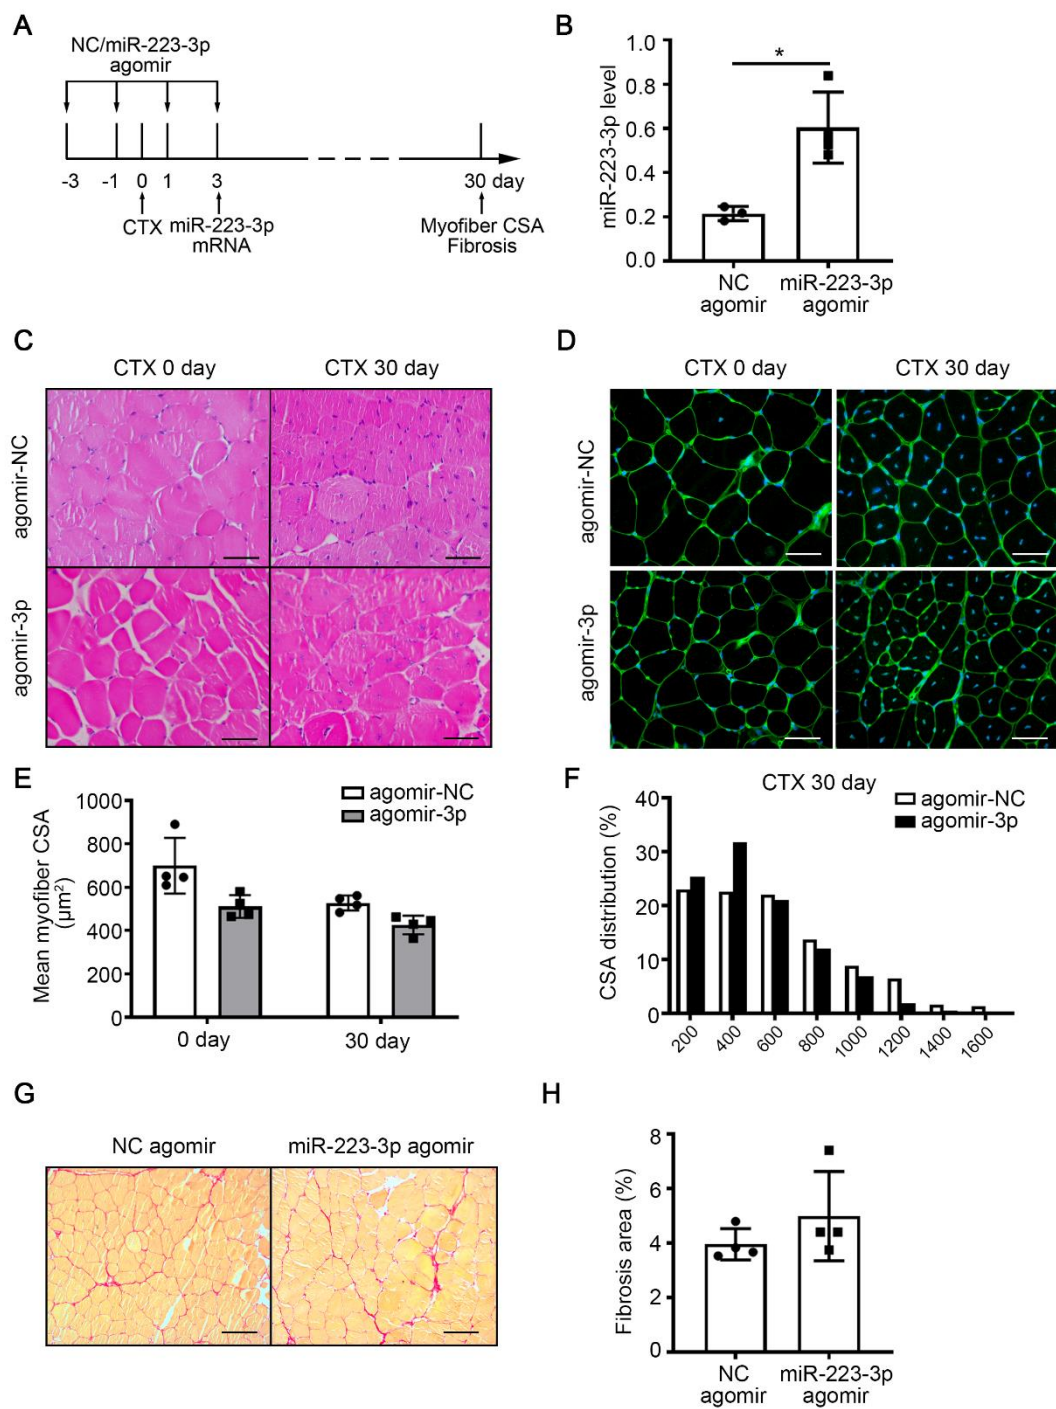

**Figure S2. Overexpression of miR-223-3p in wildtype mice does not affect muscle regeneration after injury**

A. Schematic of the experimental design. Negative control (NC) or miR-223-3p agomir ( $0.6\mu\text{Mol}\cdot\text{Kg}^{-1}$ ) was intravenous injected to WT muscle at 3 days and 1 day before and after CTX injury. At 3 after CTX injury, TA muscle was harvested to examine the overexpression efficiency of miR-223-3p agomir, and at 0 day and 30 days after injury, TA muscle was harvested to examine the regeneration.

B. RT-PCR assessment of miR-223-3p expression in the muscles of negative control (NC) and miR-223-3p agomir treated WT mice 3 days after CTX injury (n=3-4 per group).

C. Representative HE staining of muscles of negative control (NC) and miR-223-3p agomir treated WT mice at 0 day and 30 days after CTX injury. Scale bar, 50  $\mu\text{m}$ .

D. Representative WGA staining (green) of muscles of negative control (NC) and miR-223-3p agomir treated WT mice at 0 day and 30 days after CTX injury. The nuclei were counterstained with DAPI (blue). Scale bar, 50  $\mu\text{m}$ .

E. Mean myofiber cross section area (CSA) of muscles of negative control (NC) and miR-223-3p agomir treated WT mice at 0 day and 30 days after CTX injury (n=4 per group, for each sample,  $\geq 300$  myofibers were measured).

F. CSA distributions of muscles from negative control (NC) and miR-223-3p agomir treated WT mice at 30 days after CTX injury.

G. Representative Picrosirius Red staining (red) of muscles of negative control (NC) and miR-223-3p agomir treated WT mice at 30 days after CTX injury. Scale bar, 100  $\mu\text{m}$ .

H. Percentages of Picrosirius Red-positive areas per field in the muscles of negative control (NC) and miR-223-3p agomir treated WT mice at 30 days after CTX injury (n=4 per group).

Data are expressed as the mean  $\pm$  SD. \* $P < 0.05$  by unpaired two-tailed Student's t-test.

Figure S3

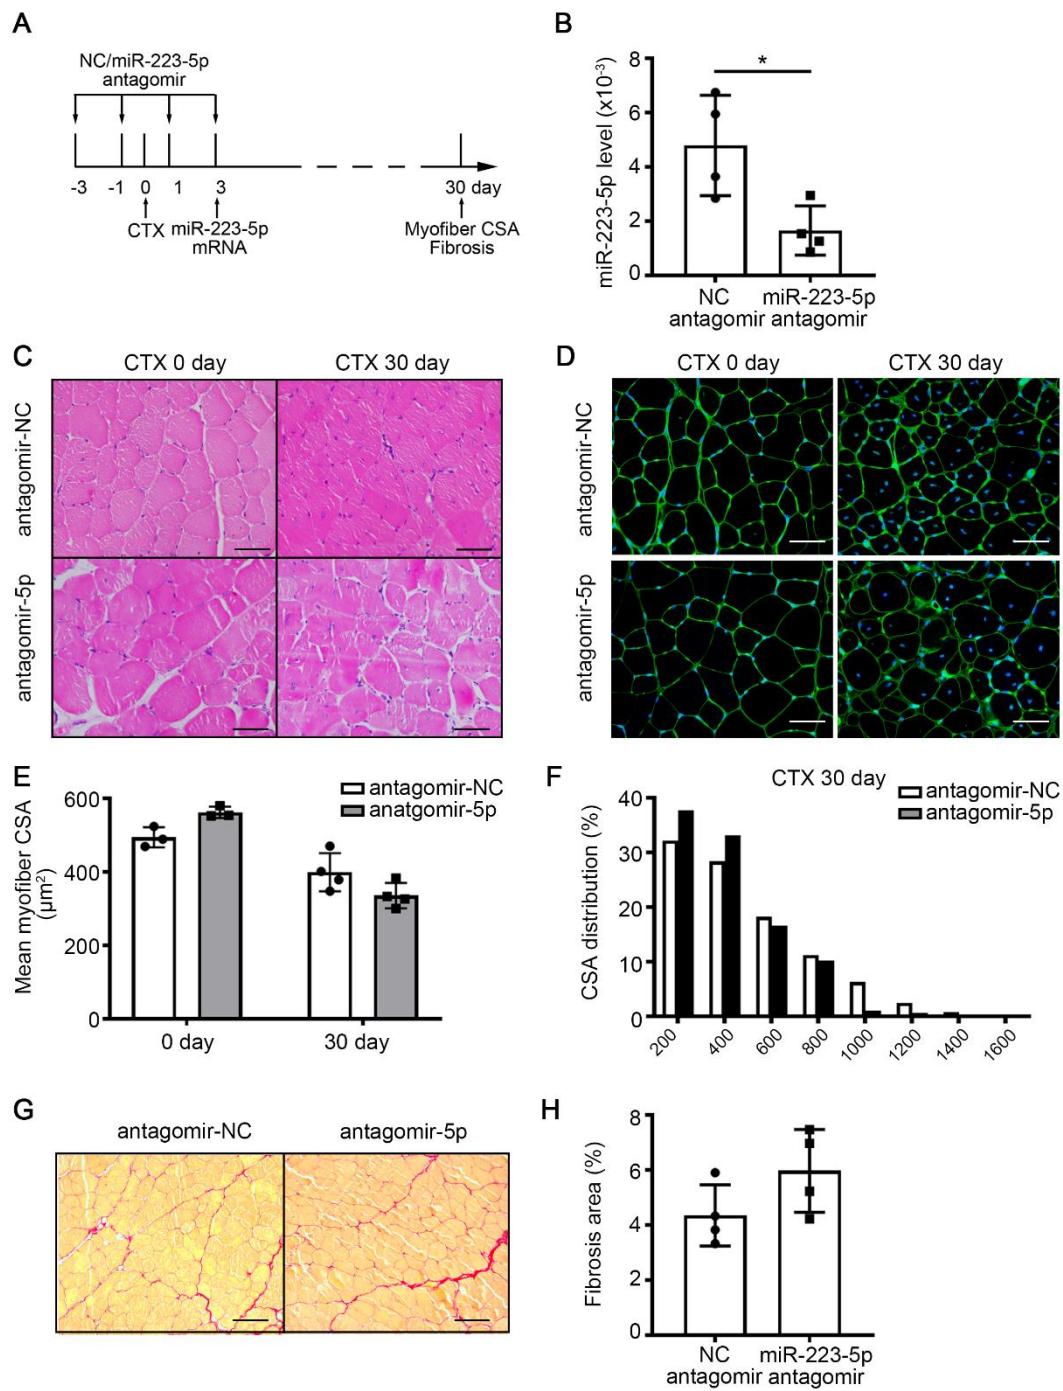

**Figure S3. Inhibition of miR-223-5p does not affect muscle regeneration of wildtype mice**

- A. Schematic of the experimental design. Negative control (NC) or miR-223-5p antagomir ( $0.6\mu\text{Mol}\cdot\text{Kg}^{-1}$ ) was intravenous injected to WT muscle at 3 days and 1 day before and after CTX injury. At 3 after CTX injury, TA muscle was harvested to examine the inhibition efficiency of miR-223-5p antagomir, and at 0 day and 30 days after injury, TA muscle was harvested to examine the regeneration.
- B. RT-PCR assessment of miR-223-5p expression in the muscles of negative control (NC) and miR-223-5p antagomir treated WT mice 3 days after CTX injury (n=4 per group).
- C. Representative HE staining of muscles of negative control (NC) and miR-223-5p antagomir treated WT mice at 0 day and 30 days after CTX injury. Scale bar, 50  $\mu\text{m}$ .
- D. Representative WGA staining (green) of muscles of negative control (NC) and miR-223-5p antagomir treated WT mice at 0 day and 30 days after CTX injury. The nuclei were counterstained with DAPI (blue). Scale bar, 50  $\mu\text{m}$ .
- E. Mean myofiber cross section area (CSA) of muscles of negative control (NC) and miR-223-5p antagomir treated WT mice at 0 day and 30 days after CTX injury (n=3-4 per group, for each sample,  $\geq 300$  myofibers were measured).
- F. CSA distributions of muscles of negative control (NC) and miR-223-5p antagomir treated WT mice at 30 days after CTX injury.
- G. Representative Picosirius Red staining (red) of muscles of negative control (NC) and miR-223-5p antagomir treated WT mice at 30 days after CTX injury. Scale bar, 100  $\mu\text{m}$ .
- H. Percentages of Picosirius Red-positive areas per field in the muscles of negative control (NC) and miR-223-5p antagomir treated WT mice at 30 days after CTX injury (n=4 per group).
- Data are expressed as the mean  $\pm$  SD. \* $P < 0.05$  by unpaired two-tailed Student's t-test.



Figure S4

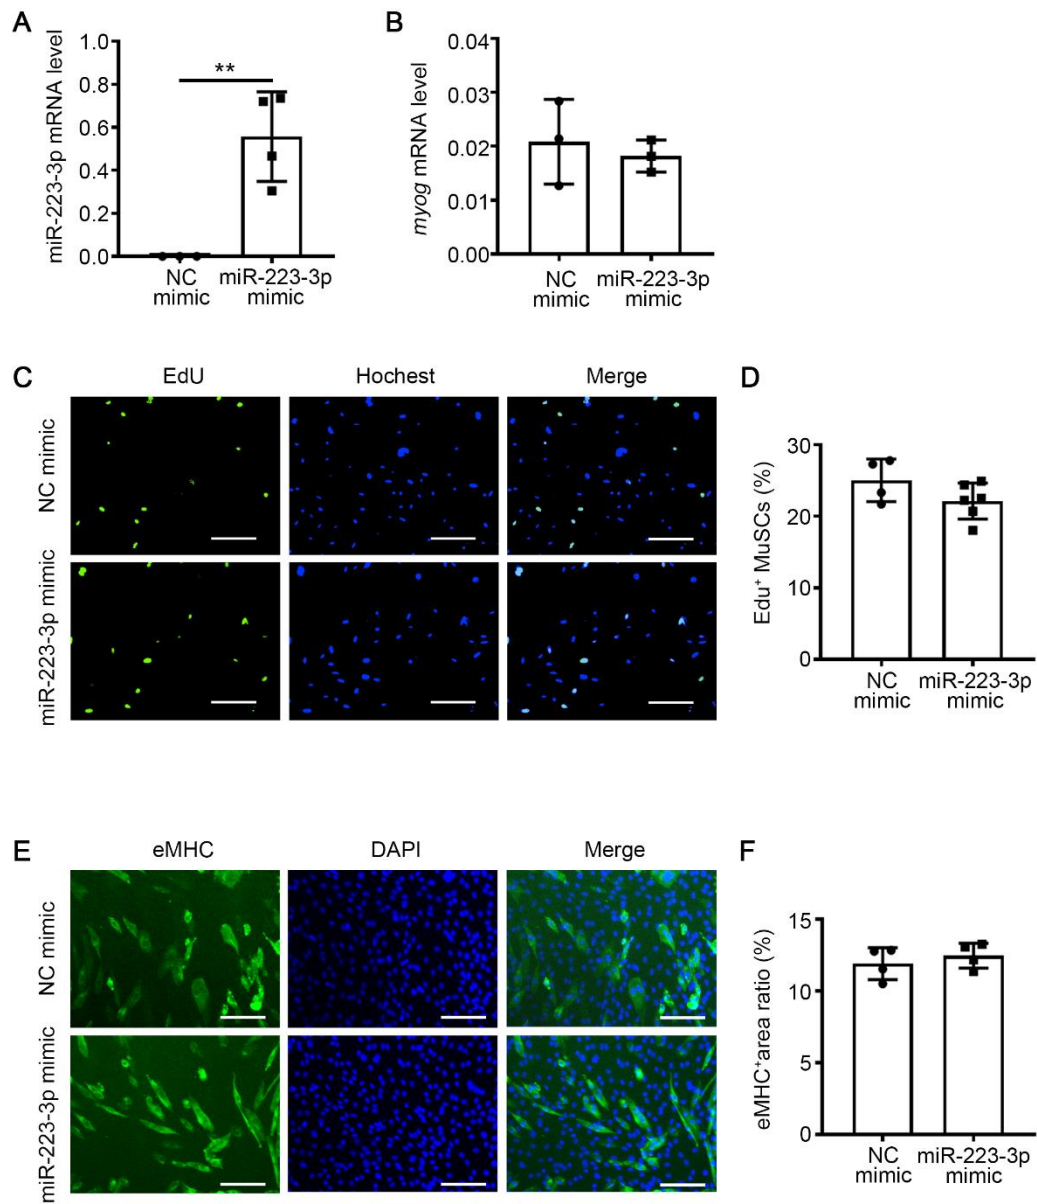

**Figure S4. MiR-223-3p does not affect MuSC proliferation or differentiation**

A. RT-PCR assessment of miR-223-3p expression in negative control (NC) and miR-223-3p mimic transfected MuSCs.

B. RT-PCR assessment of *Myog* expression in NC or miR-223-3p mimic-transfected MuSCs after culture in differentiation medium for 3 days.

C. Representative EdU staining (green) in NC and miR-223-3p mimic-transfected MuSCs. Nuclei were counterstained with DAPI (blue). Scale bar, 100  $\mu$ m.

D. Percentage of EdU-positive cells in NC and miR-223-3p mimic-transfected MuSCs (n=3-4 per group).

E. Representative eMHC immunofluorescence (green) in NC and miR-223-3p mimic-transfected MuSCs after culture in differentiation medium for 3 days. Nuclei were counterstained with DAPI (blue). Scale bar, 100  $\mu$ m.

F. Percentages of eMHC-positive areas in fields of view from NC and miR-223-3p mimic-transfected MuSCs after culture in differentiation medium for 3 days (n=3-4 per group).

Data are expressed as the mean  $\pm$  SD. \*\*\* $P < 0.001$  by unpaired two-tailed Student's t-test.

Supplemental Table1.

| Table S1. Top30 upregulated miRNAs at 1 day and 3 days after injury during muscle regeneration (FC $\geq$ 2 and FDR $\leq$ 0.001) |      |       |       |          |          |          |          |          |          |
|-----------------------------------------------------------------------------------------------------------------------------------|------|-------|-------|----------|----------|----------|----------|----------|----------|
| Symbol                                                                                                                            | FPKM |       |       | Log2 FC  |          | P-value  |          | FDR      |          |
|                                                                                                                                   | 0D   | 1D    | 3D    | 1D-vs-0D | 3D-vs-0D | 1D-vs-0D | 3D-vs-0D | 1D-vs-0D | 3D-vs-0D |
| mmu-miR-223-3p                                                                                                                    | 822  | 38849 | 16718 | 5.562595 | 4.34612  | 0        | 0        | 0        | 0        |
| mmu-miR-532-5p                                                                                                                    | 28   | 20653 | 241   | 9.526709 | 3.105534 | 0        | 4.29E-38 | 0        | 2.22E-37 |
| mmu-miR-142a-3p                                                                                                                   | 213  | 10175 | 7620  | 5.578032 | 5.160866 | 0        | 0        | 0        | 0        |
| mmu-miR-142a-5p                                                                                                                   | 180  | 5493  | 5227  | 4.931525 | 4.859914 | 0        | 0        | 0        | 0        |
| mmu-miR-21a-3p                                                                                                                    | 28   | 2126  | 970   | 6.246571 | 5.114486 | 0        | 2.4E-221 | 0        | 2.3E-220 |
| mmu-miR-200c-3p                                                                                                                   | 38   | 1002  | 697   | 4.720739 | 4.197087 | 0        | 5.5E-141 | 0        | 4.2E-140 |
| mmu-miR-339-5p                                                                                                                    | 38   | 741   | 295   | 4.285402 | 2.956644 | 3.7E-218 | 1.43E-43 | 3.9E-217 | 7.87E-43 |
| mmu-miR-223-5p                                                                                                                    | 12   | 702   | 647   | 5.870365 | 5.752659 | 1.5E-237 | 5.6E-160 | 1.6E-236 | 4.4E-159 |
| mmu-miR-297c-5p                                                                                                                   | 0    | 383   | 435   | 15.22506 | 15.40873 | 4E-141   | 3.7E-120 | 3.5E-140 | 2.7E-119 |
| mmu-miR-669l-5p                                                                                                                   | 9    | 255   | 445   | 4.824428 | 5.627737 | 3.18E-80 | 1.1E-106 | 2.33E-79 | 7.4E-106 |
| mmu-miR-130b-5p                                                                                                                   | 11   | 248   | 430   | 4.494765 | 5.288761 | 3.69E-76 | 1.1E-100 | 2.67E-75 | 7.4E-100 |
| mmu-miR-18a-3p                                                                                                                    | 0    | 133   | 226   | 13.69914 | 14.46404 | 2.94E-50 | 4.67E-62 | 1.89E-49 | 2.85E-61 |
| mmu-miR-466c-5p                                                                                                                   | 4    | 82    | 120   | 4.357552 | 4.906891 | 1.88E-25 | 4.03E-28 | 9.26E-25 | 1.92E-27 |
| mmu-miR-130b-3p                                                                                                                   | 1    | 64    | 41    | 6        | 5.357552 | 1.16E-22 | 8.88E-11 | 5.36E-22 | 2.99E-10 |
| mmu-miR-467a-3p                                                                                                                   | 2    | 64    | 24    | 5        | 3.584963 | 2.24E-21 | 0.000027 | 1.02E-20 | 7.51E-05 |
| mmu-miR-142b                                                                                                                      | 0    | 60    | 51    | 12.55075 | 12.31628 | 8.91E-23 | 1.52E-14 | 4.15E-22 | 5.57E-14 |
| mmu-miR-466c-3p                                                                                                                   | 0    | 53    | 86    | 12.37178 | 13.07012 | 3.27E-20 | 4.79E-24 | 1.46E-19 | 2.1E-23  |
| mmu-miR-466p-3p                                                                                                                   | 0    | 53    | 86    | 12.37178 | 13.07012 | 3.27E-20 | 4.79E-24 | 1.46E-19 | 2.11E-23 |
| mmu-miR-466b-3p                                                                                                                   | 0    | 53    | 86    | 12.37178 | 13.07012 | 3.27E-20 | 4.79E-24 | 1.47E-19 | 2.11E-23 |
| mmu-miR-141-3p                                                                                                                    | 2    | 47    | 50    | 4.554589 | 4.643856 | 2.12E-15 | 8.86E-12 | 8.74E-15 | 3.04E-11 |
| mmu-miR-7649-3p                                                                                                                   | 1    | 43    | 34    | 5.426265 | 5.087463 | 3.94E-15 | 1.09E-08 | 1.59E-14 | 3.37E-08 |
| mmu-miR-466f                                                                                                                      | 1    | 34    | 44    | 4.523562 | 3.459432 | 4.72E-08 | 0.007262 | 1.57E-07 | 0.016817 |
| mmu-miR-330-5p                                                                                                                    | 1    | 32    | 37    | 5        | 5.209453 | 3.21E-11 | 1.8E-09  | 1.2E-10  | 5.81E-09 |
| mmu-miR-147-3p                                                                                                                    | 0    | 31    | 19    | 11.59805 | 10.89178 | 3.77E-12 | 7.43E-06 | 1.44E-11 | 2.13E-05 |
| mmu-miR-466a-3p                                                                                                                   | 0    | 27    | 33    | 11.39874 | 11.68825 | 1.1E-10  | 1.17E-09 | 4.05E-10 | 3.84E-09 |
| mmu-miR-466e-3p                                                                                                                   | 0    | 27    | 33    | 11.39874 | 11.68825 | 1.1E-10  | 1.17E-09 | 4.07E-10 | 3.83E-09 |
| mmu-miR-500-5p                                                                                                                    | 0    | 19    | 53    | 10.89178 | 12.37178 | 9.39E-08 | 2.33E-15 | 3.09E-07 | 8.59E-15 |
| mmu-miR-8091                                                                                                                      | 0    | 15    | 23    | 10.55075 | 11.16742 | 2.74E-06 | 6.09E-07 | 8.38E-06 | 1.81E-06 |
| mmu-miR-301b-3p                                                                                                                   | 0    | 14    | 15    | 10.45121 | 10.55075 | 6.38E-06 | 9.06E-05 | 1.91E-05 | 0.000246 |
| mmu-miR-7062-5p                                                                                                                   | 0    | 13    | 29    | 10.3443  | 11.50184 | 1.48E-05 | 7.66E-09 | 4.37E-05 | 2.4E-08  |

Supplemental Table2.

| Gene          |   | primer                        |
|---------------|---|-------------------------------|
| <i>Myod1</i>  | F | 5'-AGCATAGTGGAGCGCATCTC-3'    |
|               | R | 5'-GGTCTGGGTTCCCTGTTCTG-3'    |
| <i>Myog</i>   | F | 5'-CAGCCCAGCGAGGGAATTA-3'     |
|               | R | 5'-AGAAGCTCCTGAGTTTGCCC-3'    |
| <i>Colla1</i> | F | 5'-CTCTGTCACAGTCAGAGGTGT-3'   |
|               | R | 5'-TTCCGACTTGCGGAGGAAAG-3'    |
| <i>Tgfb1</i>  | F | 5'-GTCACTGGAGTTGTACGGCA-3'    |
|               | R | 5'-AGCCCTGTATTCCGTCTCCT-3'    |
| <i>Ptprc</i>  | F | 5'-CCTACACCCAGTGATGGTGC-3'    |
|               | R | 5'-TTGTGCTTGGAGGGTCAGTG-3'    |
| <i>Itgam</i>  | F | 5'-CGTGGACCTTCCAGGATGAG-3'    |
|               | R | 5'-CATCTCGGAGCCTGTAGTGC-3'    |
| <i>Il1b</i>   | F | 5'-CGTGGACCTTCCAGGATGAG-3'    |
|               | R | 5'-CATCTCGGAGCCTGTAGTGC-3'    |
| <i>Ccl2</i>   | F | 5'-CGGCTGGAGCATCCACGTGTT-3'   |
|               | R | 5'-GTAGCAGCAGGTGAGTGGGGC-3'   |
| <i>Tnf</i>    | F | 5'-TAGCCACGTCGTAGCAAAC-3'     |
|               | R | 5'-ACAAGGTACAACCCATCGGC-3'    |
| <i>Cxcl1</i>  | F | 5'-ACTCAAGAATGGTCGCGAGG-3'    |
|               | R | 5'-GTGCCATCAGAGCAGTCTGT-3'    |
| <i>Il6</i>    | F | 5'-GGTGACAACCACGGCCTTCCC-3'   |
|               | R | 5'-AAGCCTCCGACTTGTGAAGTGGT-3' |
| <i>Actb</i>   | F | 5'-CCTTCCAGCAGATGTGGATCA-3'   |
|               | R | 5'-CTCAGTAACAGTCCGCCTAGAA-3'  |
